# Supplementary material for: Identification of a Hydroxygallic Acid Derivative, Zingibroside R1 and a Sterol Lipid as Potential Active Ingredients of Cuscuta chinensis Extract That Has Neuroprotective and Antioxidant Effects in Aged Caenorhabditis elegans
Source: MDPI journal article supplement (doi:10.3390/nu14194199), 2022-10-09
Supplement: s1 [file s1]

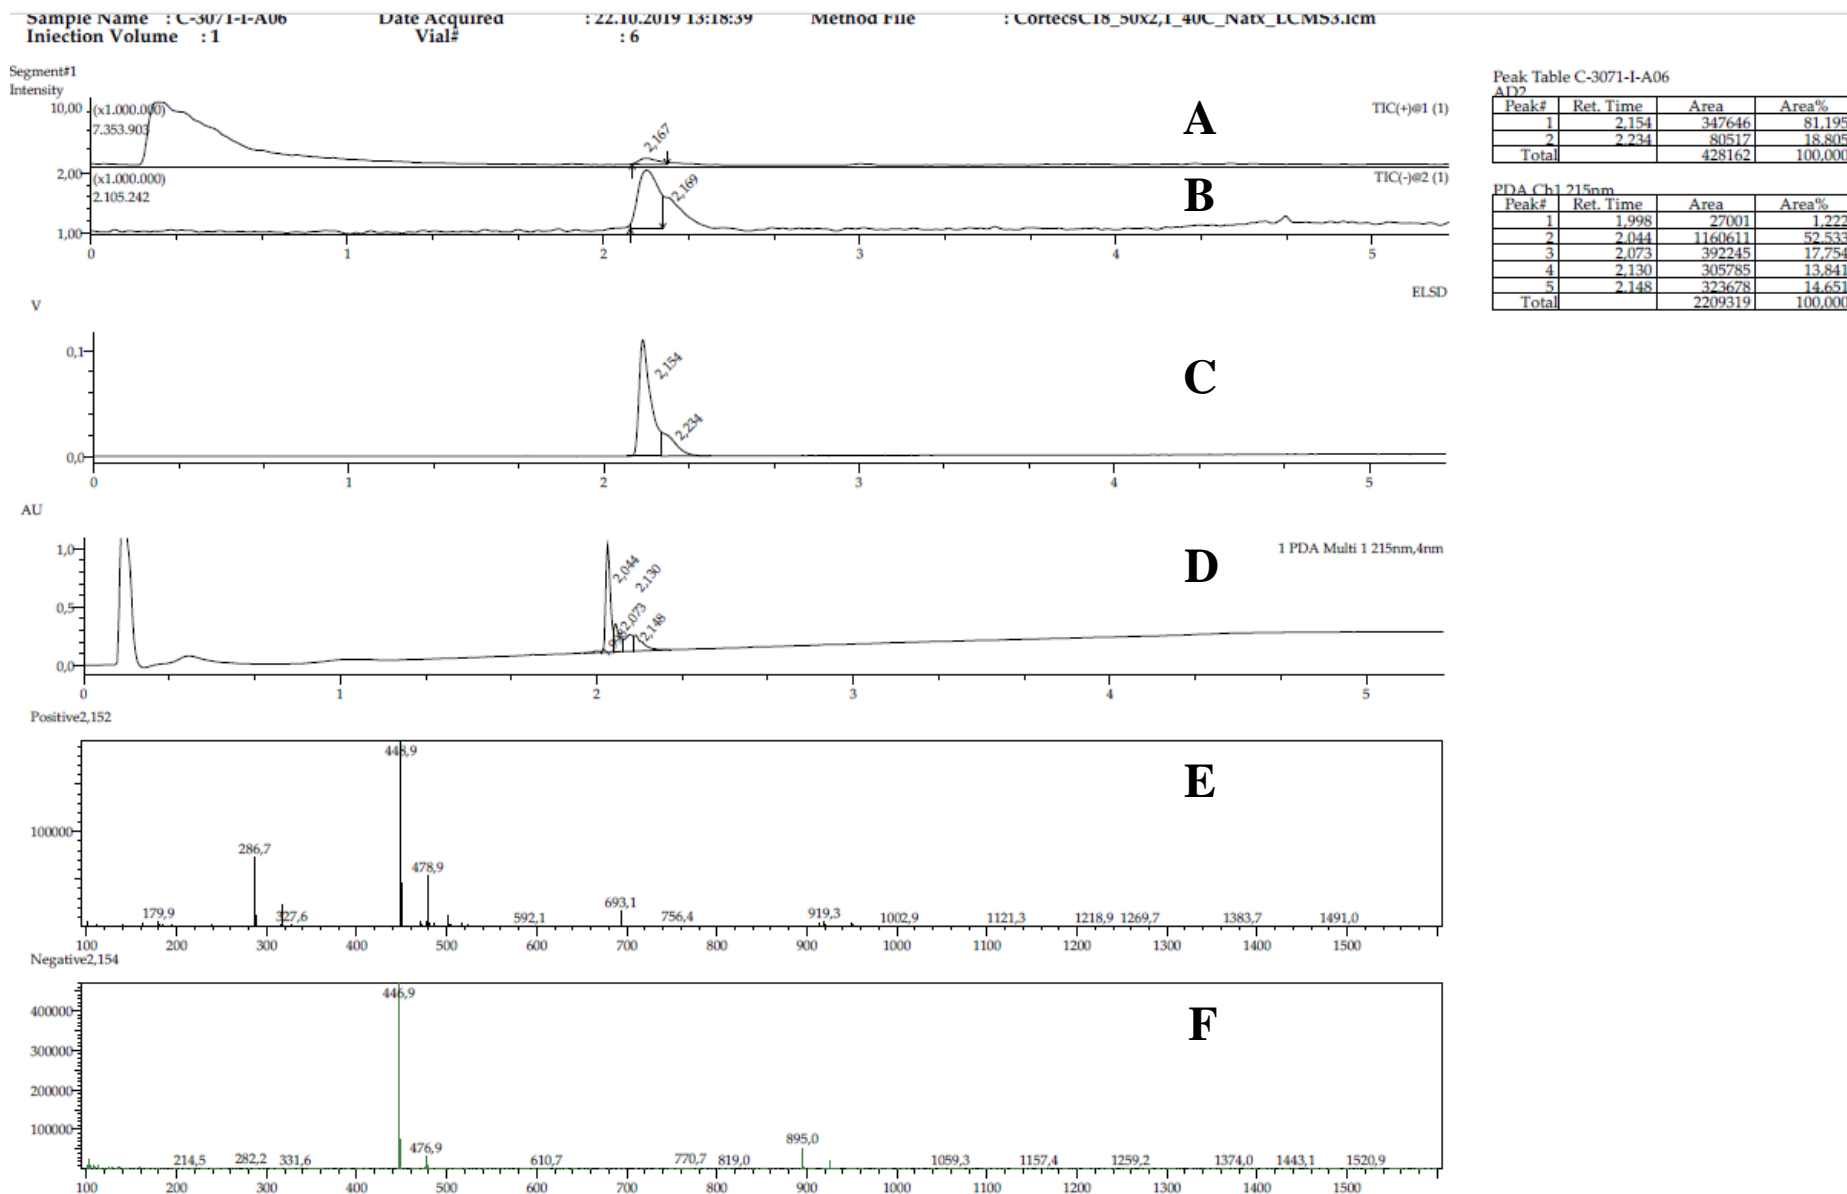

**Figure S6:** HPLC-MS analyses of the fraction C-3071-I-A06 from the *C. chinensis* extract enriched in astragalin. (A) Total ion chromatogram (TIC) in positive ion mode; (B) TIC in negative ion mode; (C) Chromatogram of the evaporative light scattering detector (ELSD); (D) Chromatogram of the photodiode array detector (PDA); (E-F) Mass spectra of the identified compound in positive and negative ion mode.

Current Data Parameters  
NAME C3071IS.005  
EXPNO 1  
PROCNO 1

F2 - Acquisition Parameters

Date\_ 20191101  
Time 11.06  
INSTRUM spect  
PROBHD 5 mm QNP 1H/1  
PULPROG zg30  
TD 32768  
SOLVENT MeOH  
NS 32  
DS 2  
SWH 8278.146 Hz  
FIDRES 0.252629 Hz  
AQ 1.9791873 sec  
RG 128  
DW 60.400 usec  
DE 6.00 usec  
TE 300.0 K  
D1 1.00000000 sec

===== CHANNEL f1 =====

NUC1 1H  
P1 11.60 usec  
PL1 5.00 dB  
SFO1 400.1324710 MHz

F2 - Processing parameters

SI 16384  
SF 400.1300913 MHz  
WDW EM  
SSB 0  
LB 0.30 Hz  
GB 0  
PC 1.00

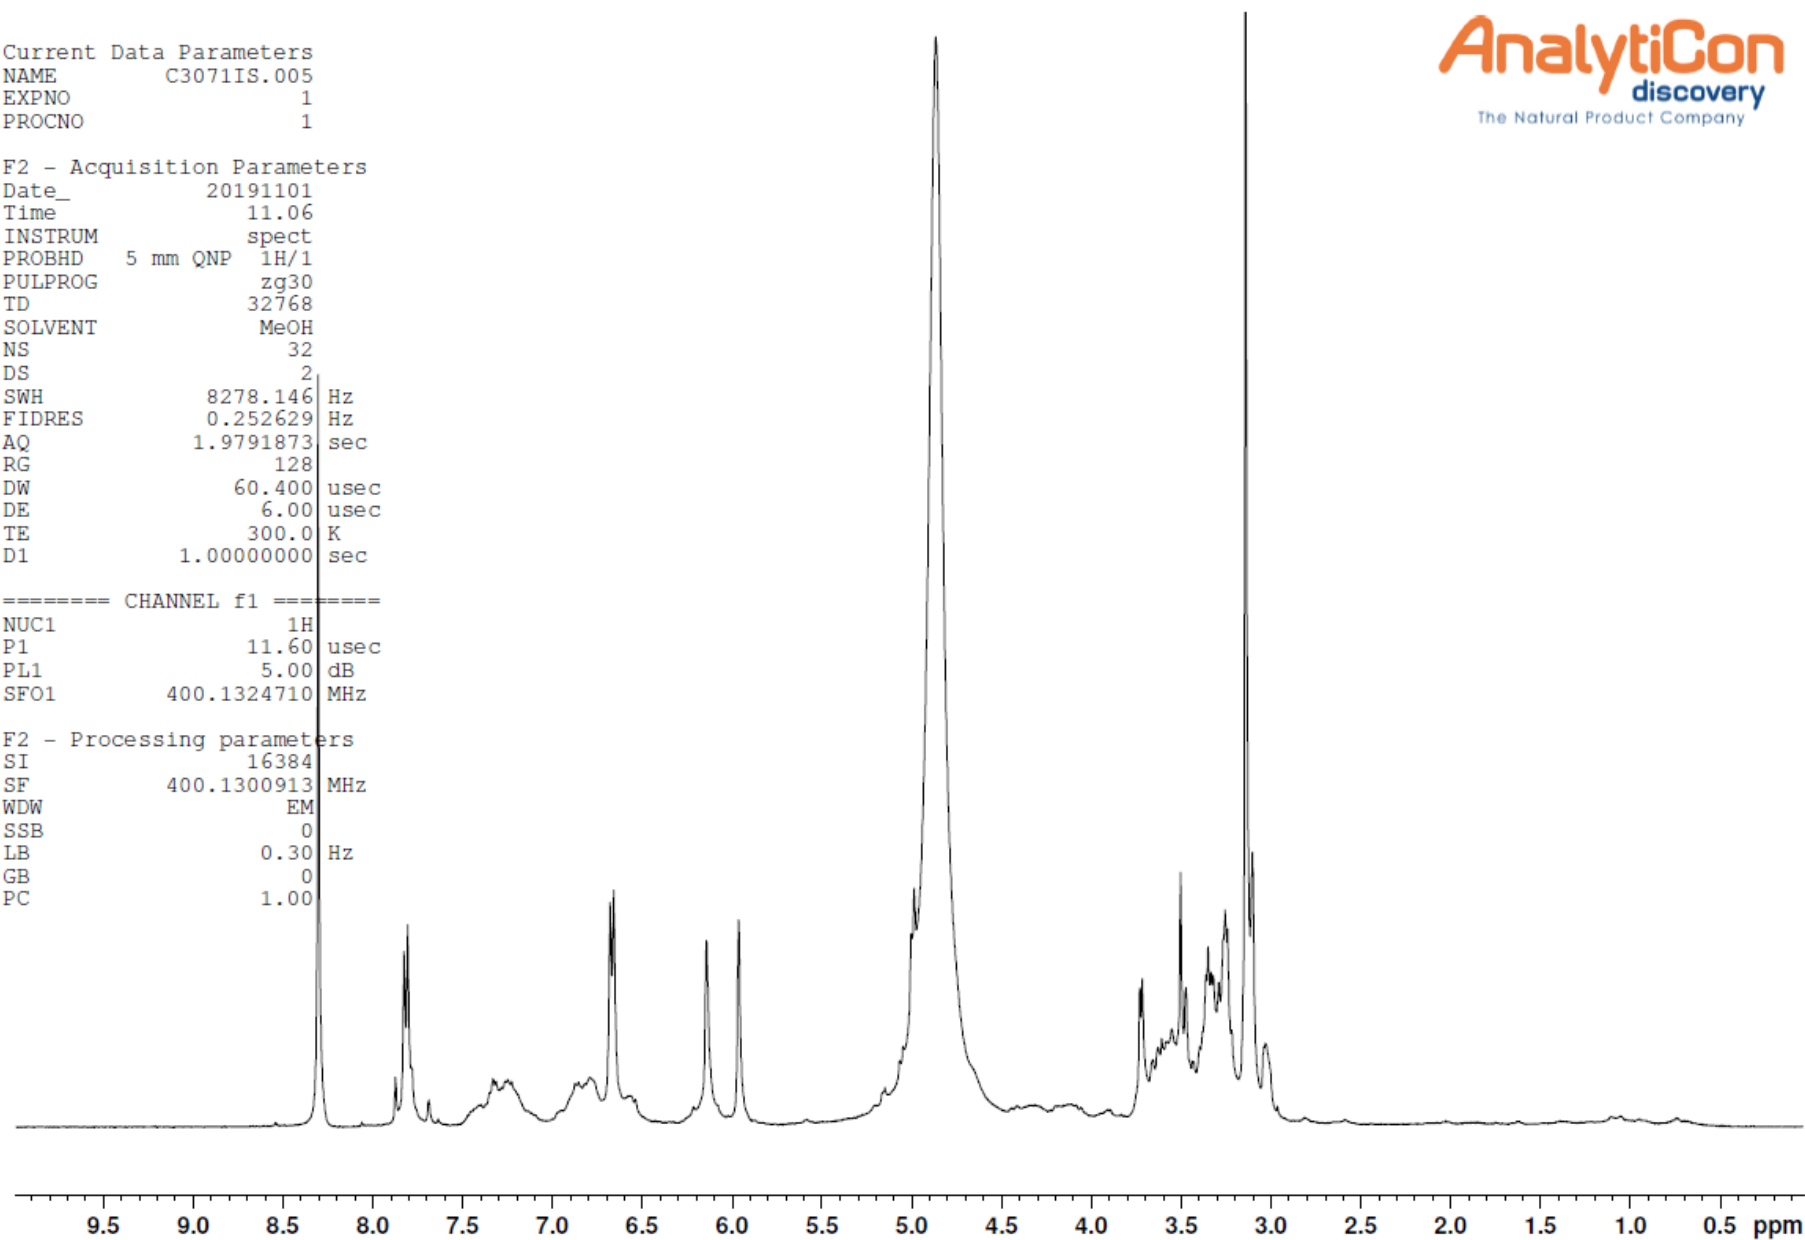

Figure S7: NMR spectrum of astragalin.

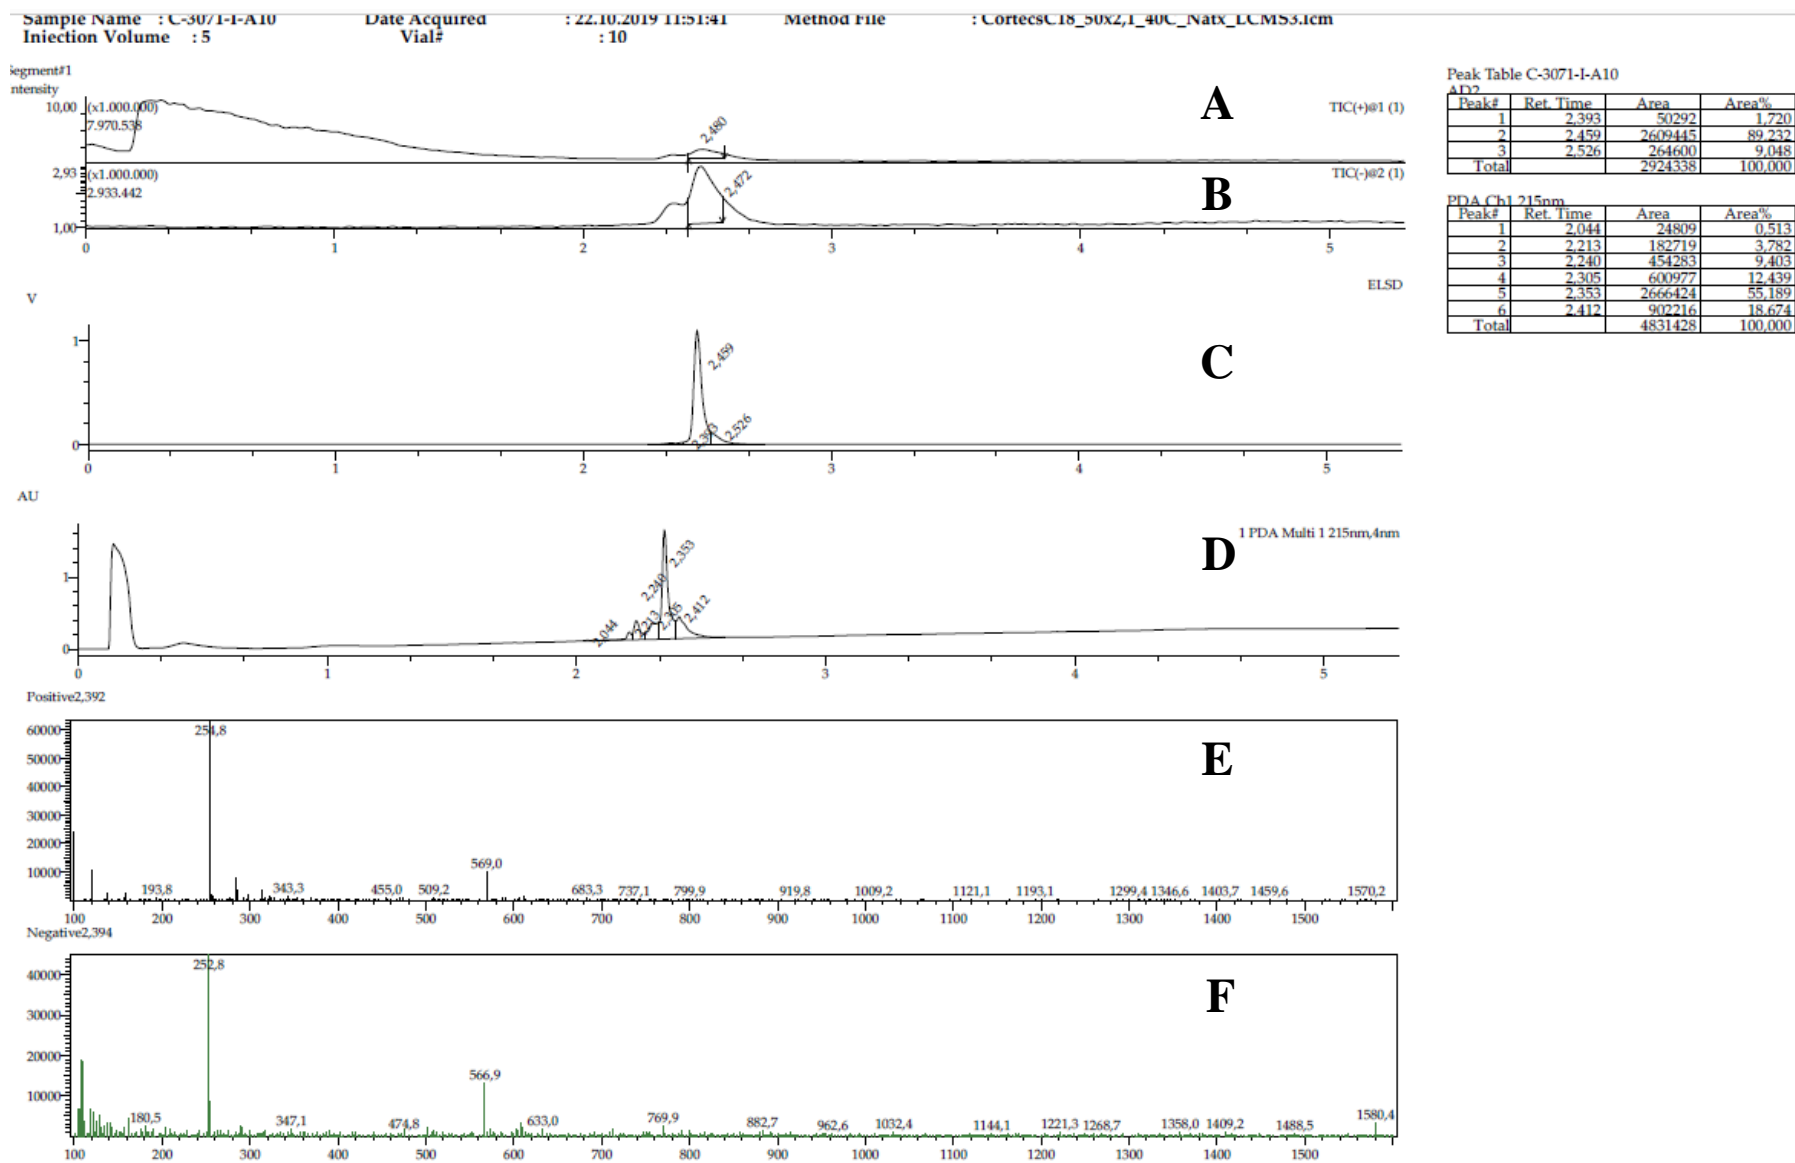

**Figure S8:** HPLC-MS analyses of the fraction C-3071-I-A10 from the *C. chinensis* extract enriched in pinoresinol. (A) Total ion chromatogram (TIC) in positive ion mode; (B) TIC in negative ion mode; (C) Chromatogram of the evaporative light scattering detector (ELSD); (D) Chromatogram of the photodiode array detector (PDA); (E-F) Mass spectra of the identified compound in positive and negative ion mode.

Current Data Parameters  
NAME C3071IS.008  
EXPNO 1  
PROCNO 1

F2 - Acquisition Parameters

Date\_ 20191101  
Time 11.34  
INSTRUM spect  
PROBHD 5 mm QNP 1H/1  
PULPROG zg30  
TD 32768  
SOLVENT MeOH  
NS 32  
DS 2  
SWH 8278.146 Hz  
FIDRES 0.252629 Hz  
AQ 1.9791873 sec  
RG 228.1  
DW 60.400 usec  
DE 6.00 usec  
TE 300.0 K  
D1 1.00000000 sec

===== CHANNEL f1 =====

NUC1 1H  
P1 11.60 usec  
PL1 5.00 dB  
SFO1 400.1324710 MHz

F2 - Processing parameters

SI 16384  
SF 400.1300913 MHz  
WDW EM  
SSB 0  
LB 0.30 Hz  
GB 0  
PC 1.00

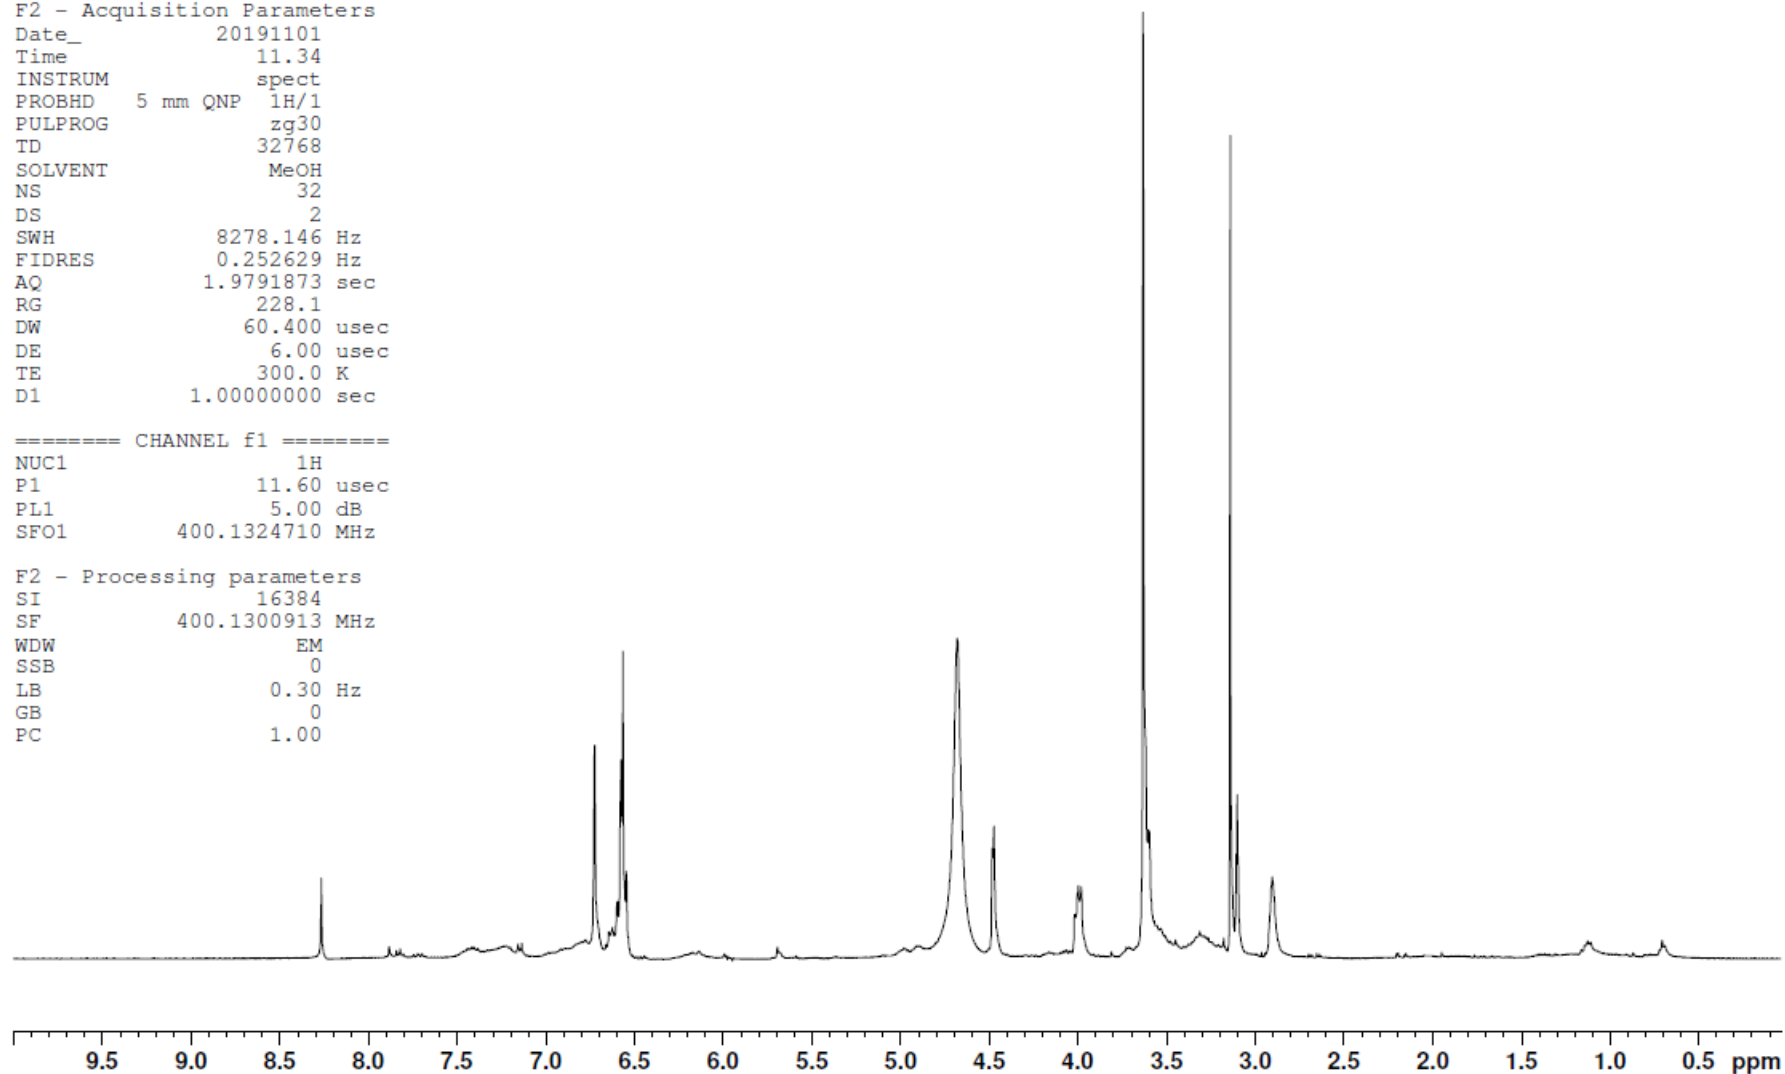

**Figure S9:** NMR spectrum of pinoresinol.

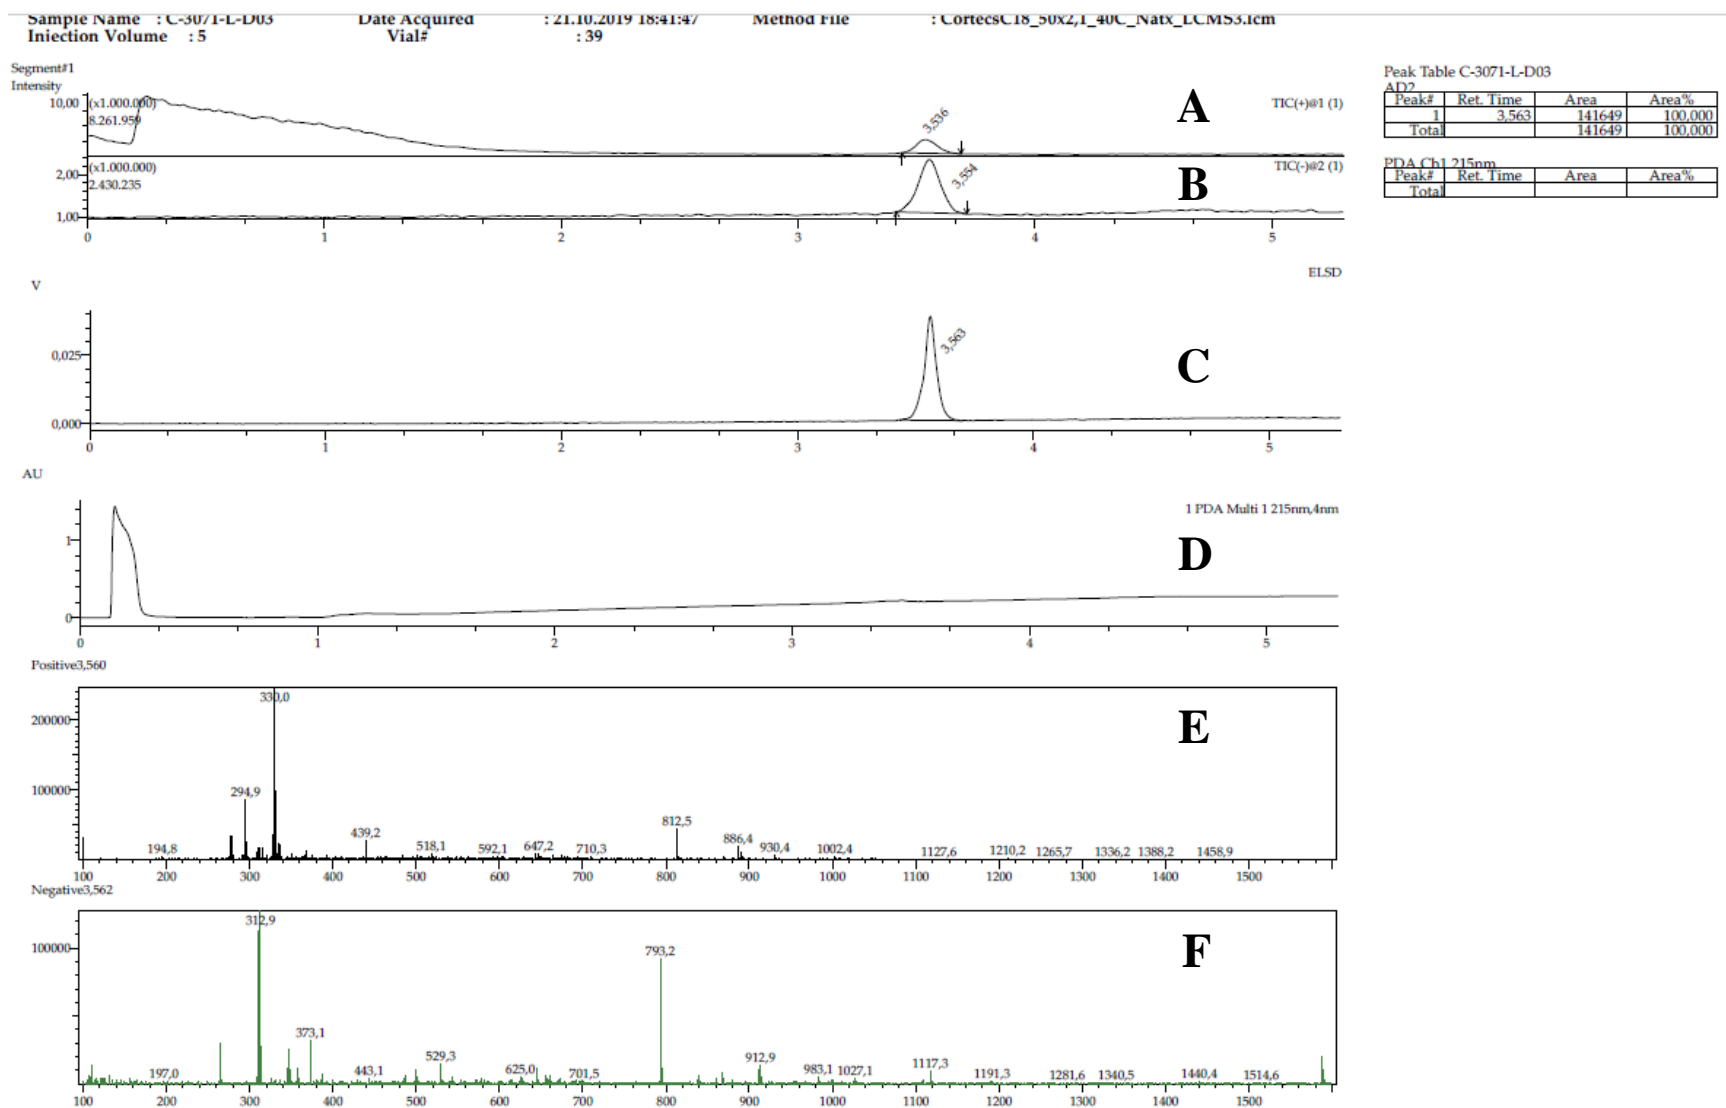

**Figure S10:** HPLC-MS analyses of the fraction C-3071-L-D03 from the *C. chinensis* extract enriched in zingibroside R1. (A) Total ion chromatogram (TIC) in positive ion mode; (B) TIC in negative ion mode; (C) Chromatogram of the evaporative light scattering detector (ELSD); (D) Chromatogram of the photodiode array detector (PDA); (E-F) Mass spectra of the identified compound in positive and negative ion mode.

Current Data Parameters  
NAME C3071LS.013  
EXPNO 1  
PROCNO 1

F2 - Acquisition Parameters  
Date\_ 20191029  
Time 11.16  
INSTRUM spect  
PROBHD 5 mm SEI 1H-13  
PULPROG zg30  
TD 32768  
SOLVENT MeOD  
NS 32  
DS 2  
SWH 10000.000 Hz  
FIDRES 0.305176 Hz  
AQ 1.6384000 sec  
RG 181  
DW 50.000 usec  
DE 6.00 usec  
TE 300.0 K  
D1 2.00000000 sec

===== CHANNEL f1 =====  
NUC1 1H  
P1 10.50 usec  
PL1 5.00 dB  
SFO1 500.1240010 MHz

F2 - Processing parameters  
SI 32768  
SF 500.1200000 MHz  
WDW EM  
SSB 0  
LB 0.30 Hz  
GB 0  
PC 1.00

AnalytiCon  
discovery  
The Natural Product Company

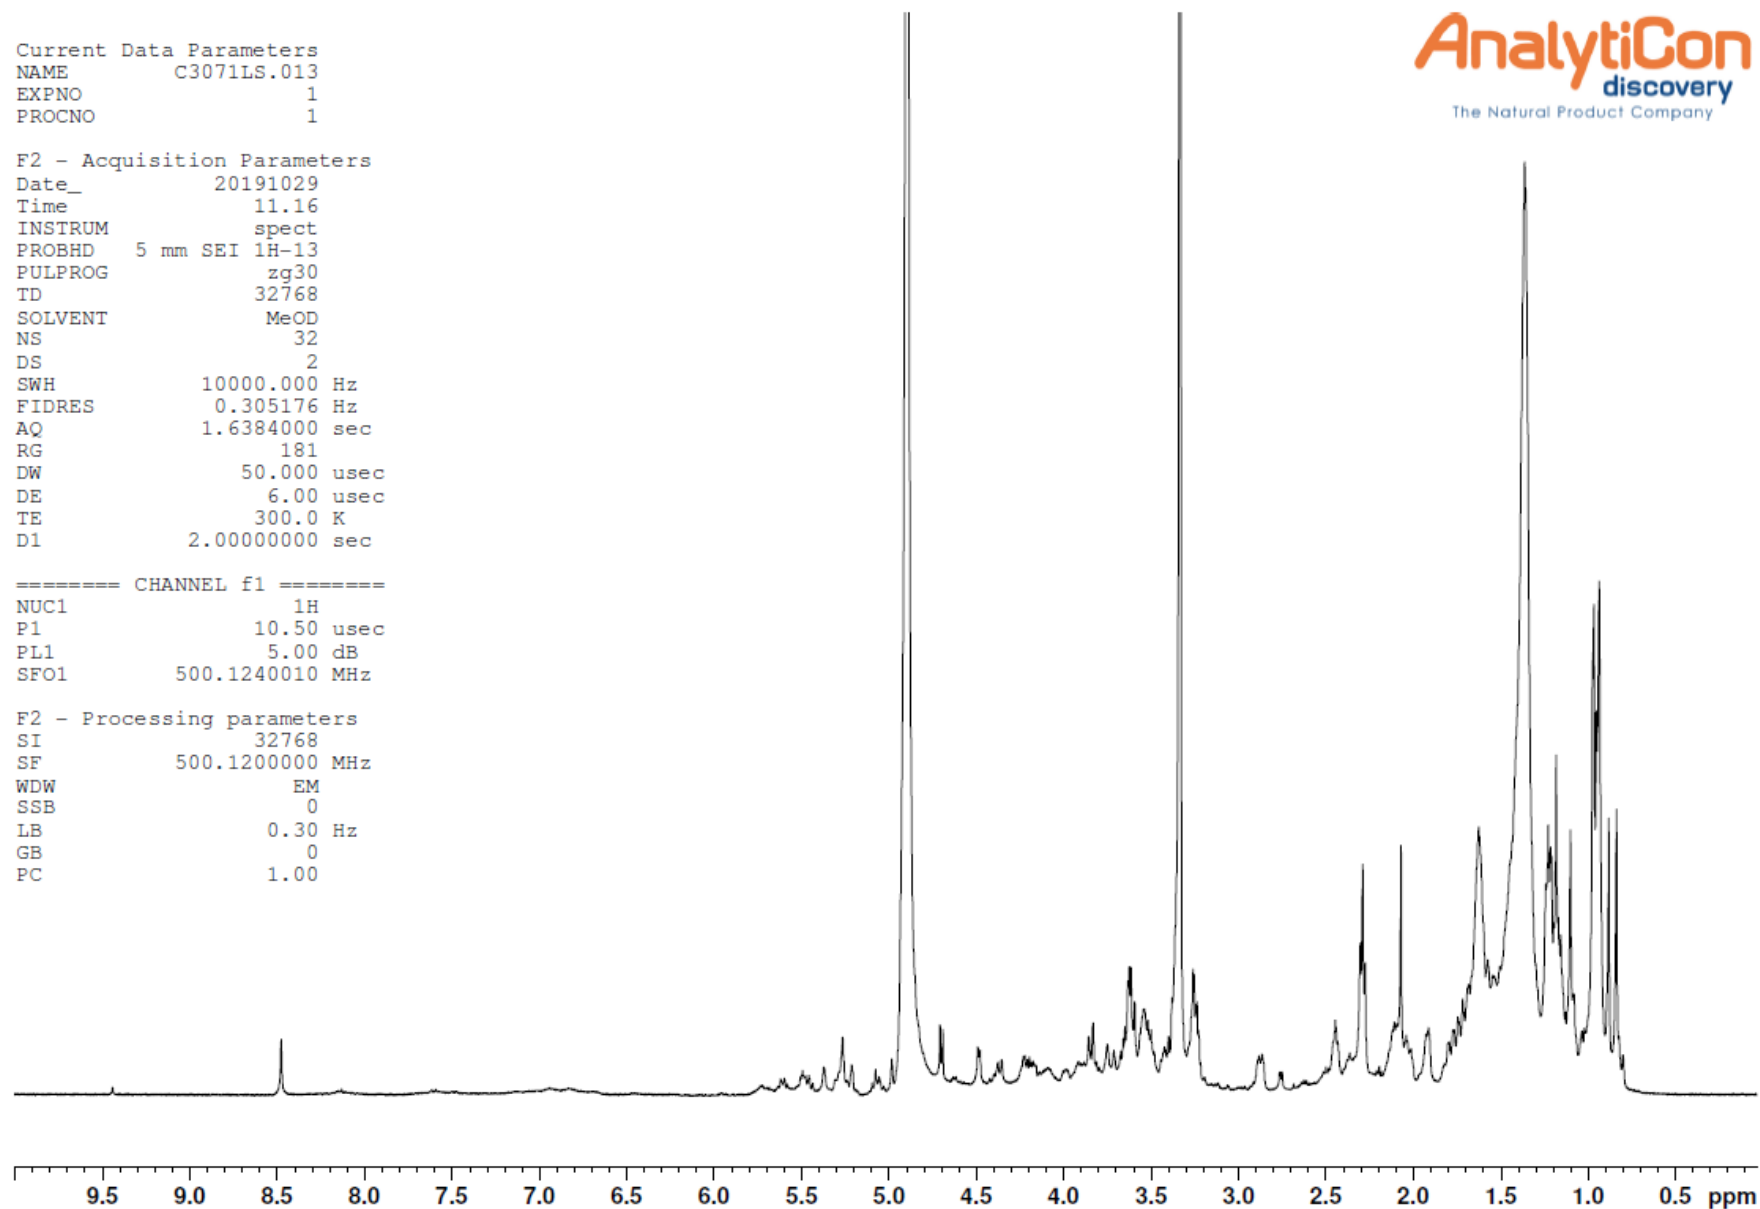

**Figure S11:** NMR spectrum of zingibroside R1.
